# Supplementary material for: Latent Tuberculosis infection in high TB disease burden countries dysregulates cellular and immunological profiles which is further enhanced with uncontrolled hyperglycemia
Source: Research Square preprint supplement (doi:10.21203/rs.3.rs-7604610/v1), 2025-10-17
Supplement: Supplementary file 1 [file 2f335c8551bd61547d4132c8.docx]

**Supplementary File 1**

**Methods**

Data collected at recruitment included diagnosis of DM, known history of contact with TB patients, chronic or acute infections and current treatments. Individuals with chronic viral infections (hepatitis B or C) or those who were immunocompromised, on antibiotic or on corticosteroid treatment were excluded. A single blood sample was collected from each study subject at the time of recruitment and data collection.

**Functional gene enrichment analysis**

CEL files were analysed using the TAC Transcriptome Analysis Software Suite (TACS version 2) using the Summarization Method: Gene Level - SST-RMA Pos vs Neg AUC Threshold: 0.7 against Genome Version: hg38 (Homo sapiens). Cellular pathway analysis of significant differentially expressed genes (DEGs) up- or down-regulated (log FC (fold change) < -2 or > 2; FDR adjusted P value <0.05) were identified by TAC software. Significantly modified pathways were sub-grouped. Further, hierarchical clustering and volcano plots were made using TACS.

To obtain further insights into the function of the differentially expressed genes (DEGs), we initially performed Gene Ontology (GO) analysis (1) using clusterProfiler ( 3).  The R package clusterProfiler, perform statistical methods to analyze and visualize functional profiles (GO) of gene and gene clusters (2). We used two types of functions from clusterProfiler i.e, enricher function (enrichGO) for hypergeometric test and GSEA (gseGO,) function for gene set enrichment analysis on user defined data. GO enrichment analysis was carried out employing enrichGO function which requires a gene list as input vector. The results are annotated along three ontologies: Molecular Functions, Biological Processes and Cellular Components with the following parameters: pvalueCutoff = 0.05, pAdjustMethod = "BH" (Benjamani and Hochberg) and qvalueCutoff = 0.05. Gene set enrichment analysis was performed on GO terms using gseGO which requires gene-list in the form of input vector, organism of interest (database: org.Hs.eg.db), pvalueCutoff = 0.05, minGSSize (minimal size of genes annotated by Ontology term for testing) = 10 and maxGSSize (maximum number of genes annotated for testing) = 800. Additional analysis was performed on wiki-pathways, using enrichWP (organism = "Homo sapiens" ) and gseWP (organism = "Homo sapiens" ). Reactome pathway was also performed as it can analyse multiple datasets simultaneously for comparative pathway analysis. The function used was gsePathway (geneList, pvalueCutoff = 0.2, pAdjustMethod = "BH"). For visualization of results related R packages such as GOplot, enrichplot, DOSE and pathview were used to generate pathway maps, dotplots, heatmaps and barplot (3-5).

**Statistical analysis of laboratory data**

Differences between age groups, hematological and cytokine parameters were compared using Kruskal-Wallis test using the PRISM 10.3 GraphPad software.

**References**

1. Huang da W, Sherman BT, Lempicki RA. Bioinformatics enrichment tools: paths toward the comprehensive functional analysis of large gene lists. Nucleic Acids Res. 2009;37(1):1-13.

2. Yu G, Wang LG, Han Y, He QY. clusterProfiler: an R package for comparing biological themes among gene clusters. OMICS. 2012;16(5):284-7.

3. Yu G, Wang LG, Yan GR, He QY. DOSE: an R/Bioconductor package for disease ontology semantic and enrichment analysis. Bioinformatics. 2015;31(4):608-9.

4. Yu G. enrichplot: Visualization of Functional Enrichment Result. 1.10.2 ed2021. p. R package.

5. Luo W, Brouwer C. Pathview: an R/Bioconductor package for pathway-based data integration and visualization. Bioinformatics. 2013;29(14):1830-1.
