# Supplementary material for: Latent Tuberculosis infection in high TB disease burden countries dysregulates cellular and immunological profiles which is further enhanced with uncontrolled hyperglycemia
Source: Research Square preprint supplement (doi:10.21203/rs.3.rs-7604610/v1), 2025-10-17
Supplement: Supplementary file 3 [file 6e28b8530c5d8bebf39c0086.xlsx]

## Sheet: Sheet1
S Table 1. List of RNA microarrays used in this study
Geo accession numbers	Sample ID	Category	GSE code
GSM8981431	DM 2	DM-LTBI	GSE297003
GSM8981432	DM 3	DM	GSE297003
GSM8981433	DM 4	DM	GSE297003
GSM8981434	DM 5	DM-LTBI	GSE297003
GSM8981435	DM 6	DM	GSE297003
GSM8981436	DM 7	DM-LTBI	GSE297003
GSM8981437	DM10	DM	GSE297003
GSM8981438	DM11	DM	GSE297003
GSM8981439	DM12	DM	GSE297003
GSM8981440	DM13	DM	GSE297003
GSM8981441	DM14	DM-LTBI	GSE297003
GSM8981442	DM15	DM	GSE297003
GSM8981443	DM16	DM-LTBI	GSE297003
GSM8981444	DM18	DM	GSE297003
GSM8981445	DM19	DM-LTBI	GSE297003
GSM8981446	DM21	DM	GSE297003
GSM8981447	DM22	DM	GSE297003
GSM8981448	DM23	DM	GSE297003
GSM8981449	DM25	DM-LTBI	GSE297003
GSM8981450	DM30	DM-LTBI	GSE297003
GSM8981451	DM32	DM-LTBI	GSE297003
GSM8981452	DM35	DM-LTBI	GSE297003
GSM8981453	EC 4	LTBI	GSE297003
GSM8981454	EC 12	LTBI	GSE297003
GSM8981455	EC5	LTBI	GSE297003
GSM8981456	EC 6	LTBI	GSE297003
GSM8981457	EC 7	LTBI	GSE297003
GSM8981458	EC 8	LTBI	GSE297003
GSM8981459	EC 10	LTBI	GSE297003
GSM8981460	EC 11	LTBI	GSE297003
GSM8981461	EC 19	LTBI	GSE297003
GSM8981462	EC 21	LTBI	GSE297003
GSM8981463	EC 22	LTBI	GSE297003
GSM8981464	EC 25	LTBI	GSE297003
GSM8981465	EC 30	LTBI	GSE297003
GSM8981466	EC 31	LTBI	GSE297003
GSM8981467	EC27	LTBI	GSE297003
GSM8981468	LTB 16	LTBI	GSE297003
GSM5374869	EC 3	EC	GSE177477
GSM5374870	EC 13	EC	GSE177477
GSM5374871	EC 15	EC	GSE177477
GSM5374872	EC 17	EC	GSE177477
GSM5374873	EC 18	EC	GSE177477
GSM5374874	EC 24	EC	GSE177477
GSM5374875	EC 26	EC	GSE177477
GSM5374876	EC 28	EC	GSE177477
GSM5374877	EC 32	EC	GSE177477
GSM5374878	EC 35	EC	GSE177477
GSM5374879	EC 38	EC	GSE177477
GSM5374880	EC 39	EC	GSE177477
