# Supplementary material for: Latent Tuberculosis infection in high TB disease burden countries dysregulates cellular and immunological profiles which is further enhanced with uncontrolled hyperglycemia
Source: Research Square preprint supplement (doi:10.21203/rs.3.rs-7604610/v1), 2025-10-17
Supplement: Supplementary file 4 [file 8c720c14f3fa33a4a1950e67.xlsx]

## Sheet: S_tab_2
S Table 2. List of Differentially Regulated Genes (DEGs) between study groups
LTBI vs EC		DM versus EC		DM-LTBI vs EC		DM-LTBI versus LTBI		DM-LTBI versus DM		H-DM vsersus C-DM		DM-LTBI group (H-DM versus C-DM)
UBE2W		SYNJ1		LRRN3		HLA-DRB5		CLEC12A		MXI1		CASC3
RASA1		SPEN		DPP4		S100A8		CX3CR1		MKRN1		MIR6866
TACC3		CACUL1		SVBP		PI3		MSRB1		SKAP2		GYPE
TLR10		USP17L21		IL6ST		S100A12		HIST2H2AA3; HIST2H2AA4		TBXAS1		RNF182
PYCR2; MIR6741		OR11L1		ERO1A		HBG1		RGS2		VNN2		MMP9
FAM91A1		KALRN		TTN		HBG2		GNLY		CHST15		IL17RA
FAM174A		CRLF3		CORO7		CA1		ADGRE2		MBNL3		IGF2BP2
ERV3-1; ZNF117		PIGB		PAM16		ANXA2		GABARAPL1		PADI2		PTPRJ
ZNF672		DESI2		CLEC12A		CD52		SLC2A3		PITHD1		NPRL3
OGT		EZR		FAM102A		HEMGN		BLVRB		ARF1		ELF1
RPGR		RCC2		LEF1		GYPA		PSENEN		MIR3620		SIGLEC10
SNRPN; SNURF; SNORD107; PWARSN		GLYR1		PIGC		RPS26		ELOF1		PTEN		SLC24A4
NUS1		HIST2H2AA4		MAN2A2		LPAR6		FGFBP2		CD302		BRD4
CLEC7A		FMN1				BCL2A1		CSF1R		LY75		PRDX6
QPCT		TMEM2				BLVRB		CCR3		SLC2A3		BAG6
ZNF780A		SAFB				HSPA8		SOS2		LAP3		DCAF12
RCAN3		PUM2				SNORD14C		TALDO1		NAGK		MKRN1
SYNE2		UBL3				SNORD14D		MVP; PAGR1		PIP4K2A		HBZ
CIRBP		CT45A8				GMFG		BSG		JAZF1		RANBP10
IL16		CT45A9				CD48		XRCC4		SIAH2		COTL1
OSBPL8		GALNT3				MS4A7		PI3		SLC4A1		SH2B3
MNDA		SLC15A5				GAPT		FCAR		DLEU2		PHF12
MIS18BP1		HNRNPU				SLC11A1		RBM47		MIR15A		TMEM63B
ZNF746		USP17L12				LIN7A		TMEM2		MIR16-1		WASF2
ZEB1		GDPD4				BPGM		HIST2H2AA4; HIST2H2AA3		MIR3613		PCGF5
ZNF780A		ITCH				HLA-DQA1		PPIL2		EPB41		LGALS9
HIST2H2AA3; HIST2H2AA4		LOC158434				HLA-DRA		MMP9		RASSF5		SIPA1L1
HIGD1A		OR51T1				CD36		TLR1		RTN4		MPEG1
CSNK1G2		KHDRBS1				R3HDM4		DESI2		GNS		FOXJ2
POLR2E		ADGRE2				IL1R2		WDFY3		FAM157B		ATP6V0C
PHTF2		TNFRSF11A				MIR21		ATP6V0B		ACSL1		RNPEP
HIST1H2AC		UBE3B				VMP1		ATP2B4		C5AR1		OSMR
OSTM1		CHI3L1				MNDA		FHL3		ATP8B4		CD93
SIRPB2		PRKDC				QPCT		GPX1		LCN2		NUCB1
IGSF6		EIF2S3				MYL4		TBXAS1		SLC6A8		SVIL
TIA1		CHMP4B				GUK1		APLP2		HRH2		MAF1
HLA-DQA1		TDP2				TLR8		IL1RN		OGFRL1		LPP
2001-03-01		GABARAPL1				LGALS3		MAN2A2		ABHD2		RAB43
KIAA0226L		HNRNPM				RGS2		MS4A7		CNTNAP3P2		UBE2M
TNPO3		MGEA5				CLEC2B		AP5M1		CNTNAP3		TMEM45B
ZFC3H1		TGOLN2				MS4A6A		GSTP1		FAM46C		STRADB
PSMD8		SPATA13				SRGN		SLC40A1		HIF1A		HIF1A
DR1		C1QTNF9				NOL12		MSN		UBE2H		GLUL
TLR1		TMEM164				PIGC		ITGB2		NPRL3		CAPZB
RAB43		RCAN3				TLR4		TRIOBP; NOL12		TRIM58		MTF1
CORO1C		OR11H1				TNFSF10		SLC15A4		RNF10		CERKL
MALT1		STIP1				TRIOBP		HCK		CEACAM8		MAP2K3
RYBP		MRPL42				FGL2		IFRD1		MBOAT2		ASCC2
EEF2; SNORD37		LBR				MYL6		METTL7A		HNRNPK		INPP5D
YEATS2		CIRBP				TREML2		PFKFB4; MIR6823		MIR7-1		PSMF1
VMP1; MIR21		ARPP21				S100A9		TMX4		ADGRE2		CHP1
PIK3C3		LAMP2				GZMK		SLC24A4		EIF4EBP2		RNF10
PABPC1; MIR7705		IRF2BPL				SELENBP1		ANKMY2		ZFAND5		TTC1
ZNF780A		HSDL2				ARGLU1		LAMP2		BPGM		MICAL2
SRGN		DIAPH1				BACH1		TDP2		YOD1		FAM210B
DDX56		FUT10				MMP9		WSB1		TIMP2		CCNI
TSG101		WWP1				RPL9P7		TIMP1		CEP295NL		NEDD9
MME		THADA				ALOX5		SVBP		ST8SIA4		FAXDC2
DCUN1D1		CD58				TRAT1		SPATA13; C1QTNF9		SLC14A1		APBB1IP
CFP		KIAA0226L				WSB1		EPM2AIP1		GABARAP		SMAP2
AHCTF1		KLRC3				LYST		ATP6V1B2		AOAH		TRIM27
CHI3L1		TMX4				BLOC1S1		PIGC		HLA-DRB1		SIGLEC7
GLIPR1		TMBIM6				MME		OS9		ATP6V0D1		CTSE
ADGRE2		UGDH				TLR1		MED15		ZFP36L2		NPIPB3
SF3B1		SLC15A4				FCAR		ANKRD27		RNASET2		FHL3
TALDO1		PLXND1				ARL6IP1		HAGH		CFLAR		JAZF1
RCBTB2		CCR3				MAN2A2		CD58		CSF3R		LINC00174
RGL2		IRS2				RGS18		CDC40		UBE2D3		ELF4
STK4		ZZEF1				GLIPR1		VMP1; MIR21		TNFRSF10C		CABIN1
RGS2		GNLY				HIGD1A		PPP1CB		MEGF9		GNAS
HLA-DRB5		PRF1				DCUN1D1		LILRA1		VIM		PSME3
RNASET2		ETS1				GTF2B		ACPP		INPP5D		FBXO7
RICTOR		LGI1				CNBP		CHI3L1		PPP3CA		SNCA
KIAA0825		STAT3				LY96		PUM2		TP53INP1		BAZ2A
FAM200B		RPS6KA1				TREM1		SDHAF2		GAB1		SHISA4
TREM1		OR2T3				USP12		RCBTB2		SLC12A6		TMCC1
ATAD2B		MYBL1				SLC2A3		LYST		SDHAF2		HDLBP
IL18RAP		USP42				TMEM45B		DPM2		ZSWIM6		PDZK1IP1
MBP		POLR2E				NCF4		ARHGAP1		DOCK5		PHOSPHO1
HLA-A		OS9				CLIC1		FGR		HCK		PKP4
CYSLTR1		ESYT1				IGSF6		DPYSL2		TXNIP		TESC
MANEA		MTMR6				PIK3C3		PRKAR1A		CHP1		SFXN5
EMB		MIR630				RIOK3		RPS6KA3		PPM1A		IL3RA
ITGAX		ARIH1				COPE		AMPD2		CPEB4		AP2M1
DNTTIP1		TMEM30A				MSRB1		AP2M1		CYBB		POLR1D
STXBP3		MSRB1				DHRS12		KCTD10		CLEC12A		SLC6A9
CHMP2A		RASSF5				CPVL		COPE		XPO6		KIRREL3
ICAM3		PPP1CB				TALDO1		DDX3X		CYFIP2		SLC48A1
NCF2		IQGAP1				ATP5L		PGD		FGR		PLVAP
ACSS2		CTDNEP1				KIAA0825		F11R		PPP2R5A		MLXIP
OGFRL1		CHMP7				LCP1		PTEN		ADGRE3		ATG9A
EIF3H		TSC22D3				FFAR2		HAL		LTF		SOX5
RPS15		MFN2				ZNF143		CDC34		LYN		ASCL3
NDE1; MIR484		OR52N2				C15orf57		RAB33B		PCBP2		NPEPPS
PTPN2		PITPNA				FGFR1OP2		ZXDC		PCBP2-OT1		SPATA6
CTSD		TACC1				MRPL42P5		PRDX6		FLI1		TP53I11
UNC93B1		JAK1				ARL6IP5		POLR2E		MAPK1		CORO1B
TRAT1		SPTBN1				CEACAM4		KIAA0825		EPB42		ERGIC1
KIAA1551		SNRPN				IL1RN		WLS		LGALS9		KPNA1
PHF2		SNURF				NFE2		ADRBK1		SPPL3		TANGO2
CLIC1		SNORD107				VCAN		GALNT3		SIGLEC9		MVB12A
SH2D3C		PWARSN				CCDC109B		CNTNAP3B		ADGRE5		BISPR
CD36		HIPK3				HIST2H2AA4		ATP2B1		WDR26		LCN9
RGS18		ELOF1				CDC40		BAG1		MIR4742		TGM2
ARID5A		MCL1				HIST2H2AA3		CNBP		C10orf54		GUCD1
CYP4F3		PAK2				CFP		NAAA		UBE2R2		XK
CCDC109B		TALDO1				FAU		SH3BP1; PDXP		KLF3		CARM1
PISD; MIR7109		FAM46A				GABARAPL1		CTSC		STRADB		MTMR3
FBXO8		ABHD2				LMO2		CHST11		STK10		IFNGR2
MAL		POLG2				CHMP3		MFN2		CD68		CELF1
GPR183		FHL3				SDCBP		ARAP2		MPP1		ADD1
HN1		KLRC2				DDX3X		ARIH1; MIR630		GNAS		ANKRD44
PECAM1		SLC2A3				PRAF2		BAG6		PLEK		NSF
CLEC4E		ATP2B1				WDR45		ROPN1L		ECH1		JARID2
MBIP		HEATR5A				CSF1R		RNF34		THTPA		KRTAP27-1
TREML2		VPS8				SF3B1		MMS19		EIF4G2		HIP1
TC2N		RNASET2				CASS4		WWC3		SNORD97		NBPF9
AGO4		MBP				PFDN5		HEATR5A		GNAI2		ZDHHC7
TMEM71		CHMP2A				GBP3		SF3B1		CAPZB		SMG7
ALOX5AP		ATP2B4				RCBTB2		MRFAP1		FAM27E3		BICD2
ARL15		C4orf47				ZNF780A		KLHL12		BCL2L1		MXD4
TLR8		TNPO3				EMB		ZNF417		UBAP1		MIR4800
CDC42SE2		RAB11FIP1				PPBP		CHMP4B		PECAM1		MFHAS1
ALOX5		RPS6KA3				AP1S2		HNRNPA0		RARA		MLXIP
CASS4		DCN				SBDS		TNFRSF9		ZDHHC18		TINAG
TNFSF8		PGRMC2				PPIL2		ADGRG1		ANPEP		TMEM38A
GRK6		DDX56				SLC25A39		PELI2		CFL1		ADIPOR1
SLC11A1		ADGRE5				ADGRE2		KANSL1L		KIAA0430		PLCB2
WAS		CHST15				ANKRD12		NUPL2		MIR6506		SRGAP2
PNRC1		ASAP1				AMPD2		SERINC3		PLP2		VDR
APOBEC3A		PPP4R3A				MIR6125		ABHD2		LUZP6		CNIH3
GAPT		PSG5				NUDT4		AGO4		MTPN		LILRA6
DHRS12		ADGRG1				RAB33B		KCNJ2		B3GNT5		RHCE
OR51F2		SORL1				USP15		WDR37		RANBP10		ZNF354B
JCHAIN		ZSWIM6				WBP2		DNAJC6		CSF3R		SF3A1
CD27		MSN				DNAJC6		ASNSD1		UBB		GNAO1
RPL19		SEL1L				RBX1		CHMP2A		ASAH1		KMT2D
UBN1		SIRPB2				ATP6V0B		PPM1F		GLUL		OR6C1
SS18		HLA-C				MVP		PLAUR		CLEC7A		CDC34
ESCO1		PECAM1				PADI4		DUSP6		OAZ1		PDE4A
SESN3		PRKAR1A				PAGR1		PITPNA		ATG9A		VPS39
DOK3		CAPN7				ROPN1L		DSCR3		SDCBP		HK2
GYPA		IGF2R				ITGAX		COPS4		FCGR2C		STRADA
PNISR		CHST11				LXN		TLR2		CAT		SLC4A7
EGLN1		TLN1				YOD1		HSDL2		CREBBP		ZNF623
TRIOBP; NOL12		MIR6852				PGAM1		SAMD4A		PRCP		ZBTB26
SLC2A3		CYBRD1				TMEM183A		IGF2R		GNA13		GPN1
PI3		CSF2RA				FAM126B		RNF220		IL6R		PFDN6
FAM101B		CCNG2				MACF1		ZNF227		SLC6A6		MIR6834
BACH1		PPP2R5A				ITGB2		PRF1		PRSS16		LONRF3
VTA1		PELI1				KXD1		LOC650293		PLD3		TSPAN13
GPX4		MYH9				EMC3		OR2M4		CTDNEP1		GPATCH11
TRIM59		GLUL				MIR761		OR51T1		AP2M1		SNX6
RBM47		FAM101B				NRDC		MAGEB16		TARDBP		TMEM126B
RASSF2		OSTM1				RBM47		PDCD1LG2		COTL1		ANKRD46
USP17L22; USP17L20		CUX1				EVI2A		HTR3B		DPYD		TCTEX1D2
NRDC; MIR761		RHOQ				EVI2B		OR4F4; OR4F17		ZFP36		ARID4A
SLC2A14		ZNFX1				BSG		SPRR2E		GSPT1		SPATA5
ARGLU1		MAP1LC3B				FCER2		PSG5		RPAP1		UTP15
CORO1A		ABCA1				ICE2		TAAR3		INPP5D		DIEXF
KIAA0430; MIR6506		BROX				CTDSPL2		CNR1		OR2W3		CCT2
ZNF654		KLRD1				PDXP		GYG2		MAPK3		NAA15
PANK2		ACTN1				PNPLA6		LGI1		RHOA		ZBTB41
MAST3		HMGN1P3				SH3BP1		PHACTR3		RNF144B		TUSC1
TMEM183A		PTEN				UQCRC2		OR1S2		ROPN1L		RPP30
HCAR2		ABCG1				PADI4		OR52E1		NINJ2		WDR44
WSB1		CAB39				RIT1		TCERG1		SLC25A37		SDHAF3
CLK4		ADAM29				SYNGR2		OR2T3		WHSC1L1		SLC25A46
RTN3		RBM47				WAS		DEFB118		PPP3R1		ATAD1
ARL6IP5		TGFBR2				CORO7		ARPP21		YBX3		NPHP3-ACAD11
CAT		PTPN22				ICAM3		POGZ		C17orf62		LINC01599
ATP5L		ANXA11				PAM16		USP13		EPB42		DEK
UPK3BL; POLR2J2		AGO4				SF3B6		CT45A8		MCL1		SNRPD3
SULF2		HCK				UBE2W		CT45A9		FBXO7		S100P
C3orf38		ITPK1				VTA1		SPRR2B		DENND3		COG5
CD180		TNFRSF9				ZNF267		RTN4		CX3CR1		MBIP
AFF3		ETS2				CTSD		RAD54B		SMAP2		ANKAR
BLVRB		KLRC1				POLR2E		SSX2; SSX2B		DIP2B		THSD4
MS4A7		GNAI2				SLC40A1		OR2L3		CNTNAP3		CYP51A1
STEAP4		WDTC1				TNFSF8		RP11-569G13.3; LOC158434; setora		FGL2		OMA1
PDK2		POLR2A				ZNF33A		KCNA10		SYVN1		THOC2
DSC2		CMIP				C18orf32		KSR2		GDE1		FUT8
USP17L11; USP17L18; USP17L20		RPS6KA5				F5		OR4F17		FOXJ2		UFM1
CSF2RB		SHISA5				GDI2		MAFIP; TEKT4P2		BCL6		IRAK1BP1
HLA-DRB1		RGS2				SLC6A6		USP17L12		FAM65B		RWDD1
FGL2						ACPP		DCN		NABP1		HS3ST3A1
SOD2						APLP2		SSX2B		SMAD4		ZNF354B
						CBWD3		FAM153B		SLC11A1		AHSA2
						CLEC12A		TNFRSF11A		ZNF516		DDX59
						HCCS		RPL14		EZH1		ARHGAP5
						JAK2		PGRMC1		PDK4		HNRNPR
						ST3GAL6				UBAP2L		FAM118B
						CORO1C				CHI3L1		FAAP100
						TMEM71				LILRB2		PRPF40A
						ALPK1				TICAM2		CGRRF1
						ATP6V1B2				TMED7		TFB2M
						DNTTIP1				NOTCH2		WDR19
						GPX1				CAB39		ZNF611
						KIAA1586				NFAM1		C1orf21
						FKBP8				LTA4H		ANKRD26
						RHBDD1				DESI2		FAM60A
						ZNF24				USP32P2		NSMCE2
						HAGH				FAM106A		ORMDL1
						NOP10				CCDC144B		ALG2
						OR2W3				NCEH1		RNASE1
						DCP2				NCOA4		SMC3
						IL4R				PPP1CB		TMEM50B
						SVBP				CLEC5A		ZNF253
						TMEM167A				KRT23		MOB4
						GNG10				NBEAL2		FYTTD1
						GYPB				LRRN1		TRA2B
						CD86				ADIPOR1		BOLA3
						CNEP1R1				ZNF776		TMED2
						PF4				PNRC1		PSIP1
						PGK1				BCL2L11		ZNF510
						HNRNPC				SLC45A4		TPR
						KIAA1551				PYGL		TYW3
						ZNF644				NBPF14		ANKRD36C
						ARL15				ARHGEF12		PIN4
						CKLF-CMTM1				SPAG9		MYSM1
						CLEC7A				CTSA		TTC27
						SEC62				PXN		MIR4765
						SUGP2				IGF2BP2		AASDH
						PSMD4				SPTLC2		RSF1
						IL18RAP				DGCR2		MINOS1
						OGFRL1				DGCR11		RABGGTB
						ST8SIA4				CRLF3		SNORD45B
						PNRC1				HIPK1		SNORD45A
						PSMD8				NCF2		SNORD45C
						TERF2				RNF111		NMD3
						F11R				ACPP		CNTRL
						GPR183				CSH2		SNRNP27
						HMGCR				NUMB		CWC15
						LPAR1				LRRC47		UBXN4
						MIR484				CHCHD3		ANAPC4
						NDE1				G6PD		ZNF555
						SPAST				EIF2AK1		HAUS1
						ATP6V0E1				ZFAND3		CBWD6
						GPS2				TGFBR2		CBWD5
						MRFAP1				IRF2		CBWD7
						PARVG				CDC42EP3		OSTC
						SLC35E3				DIAPH1		CTR9
						TCP11L2				FCGR3A		DLGAP5
						TUBA1A				MAML3		ERGIC2
						CYSLTR1				PARP4		TDRD3
						DBNL				KCMF1		ZFAND6
						DOK3				MFN2		KIAA0586
						ERV3-1				ANO10		MTHFD2
						GMPR2				DEGS1		SKIV2L2
						IRF9				PSAP		TTC33
						LAMTOR5				BPI		DNAJC10
						MIR6837				MSL1		SREK1IP1
						NUCB1				ITGAX		USPL1
						RBBP5				LARP1		TRDMT1
						SERINC3				DGKD		ARL1
						ZNF117				IGF2R		NOC3L
						EIF3G				LRP10		IDI1
						GNG7				SPI1		CCNB1IP1
						IRF8				TMEM123		SNORD126
						LILRA1				LAMP2		AKT3
						PNPLA8				HM13		WDR76
						RBM15B				MCTS2P		ZFAND1
						TC2N				ERGIC1		TBCA
						ZBTB34				SLC44A2		EED
						CAP1				SUPT20HL2		MIR6755
						ENSA				NAIP		MAGOH
						RASA1				FAM153A		VPS50
						ZNF746				GPR141		ZNF845
						BGLAP				YIPF3		SNRPE
						CYP4F3				EIF1		MRPL50
						EAPP				WDTC1		PHF14
						IDH3G				BROX		RSRC1
						PMF1				RPN2		ADH5
						RGS10				H1F0		TRMT5
						SRSF3				PCNXL4		KCNA2
						OSER1				TRIM25		NUCB2
						PIAS1				MIR3614		MITD1
						PRDX6				CPPED1		ESD
						RPGR				ELOVL5		LYRM2
						ZNF672				STAU1		LINS1
						CORO1A				STAC3		CFL2
						DHX34				ATF6B		GPBP1
						NDUFB8				DCAF12		METAP1
						PNISR				TRAM1		METTL14
						AHCTF1				DPM2		ZNF83
						ARPC2				AGFG1		MRPS22
						ASAH1				MIR5703		TAF1D
						CD4				FAR2		SNORA8
						CTSH				RIF1		SNORA18
						HELZ				TIPARP		SNORA40
						HN1				SLC43A2		SNORA1
						MPEG1				SEMA4A		SNORA25
						NAAA				NOTCH2NL		SNORA32
						PHF2				TMBIM6		SNORD5
						SQRDL				SLC6A7		MIR1304
						GHITM				CTNNA1		CEP57
						PPM1F				GATS		CETN2
						SESN3				TARM1		UQCRQ
						SLC24A4				GBA		IER3IP1
						KCNE3				RGS2		MSMO1
						VDAC3				GLIPR2		HINT3
						BAG5				MSL2		FASTKD2
						CCT2				ODC1		ATP6V1C1
						CDKN2AIP				SNORA80B		RCN2
						SERPINB8				HIPK1		EPHA4
						SIRPB1				FXYD5		DDX26B
						BBX				MOB1A		TTC3
						FCER1G				TNIP1		ETFA
						FRG1				ALAS1		DPM1
						NCF2				TLE3		FAM3C2
						RABGEF1				POMZP3		CAPN7
						TMEM55A				CRISPLD2		FBL
						AGO4				RREB1		DNAJC8
						ARPC4				DSCR3		SNX4
						CAPG				TMC7		TMEM261
						PTPN2				NR3C1		ASCC3
						SPOPL				RSRP1		TOMM70A
						SULF2				NCF4		AP3B1
						TBC1D23				SETD1B		HIGD1A
						TMEM259				ATP6V0A1		CFAP97
						BID				MIR5010		TFAM
						CDC42SE2				ALDH2		ASF1A
						FBXO8				GPCPD1		ESF1
						MRPL20				YIF1B		HNRNPA1
						MTM1				SERINC3		RTCB
						NLRP3				MYO1F		FCER1A
						SERPINA1				ARAP1		MRPL32
						TLR10				ENTPD1		UQCR10
						ABTB1				DMXL1		ANKRD49
						EPB41L3				PABPC1L2A		CHMP5
						GPR108				PLAGL1		COL19A1
						KIAA0040				HYMAI		USP53
						LYPLAL1				MYOF		GCC2
						MIR6791				PTPN2		GNL3
						MYO1G				PRKCD		SNORD19B
						NABP1				HNRNPH2		RBMX2
						NUPL2				C16orf72		NOSIP
						P2RX1				KIAA0513		ANAPC16
						SHCBP1				EIF4G1		ZNF644
						MS4A3				TAOK3		CLDND1
						SLC2A2				FAM65A		DZIP3
						PSMC3IP				PCYT1A		ARL4A
						RPL14				RANBP3		CDC5L
						TCP10L2				ISG20L2		CAPZA1
						ND6				SLC15A4		NR3C2
						DNAH14				TESC		TVP23B
						ABCD2				GOLGA8EP		TRIM59
						C4orf19				GOLGA8DP		HSPE1-MOB4
						LRRN3				POTEA		NTN4
										CEACAM6		ATAD2B
										PATZ1		C1orf131
										LILRA1		CCR6
										AHR		SNORD49A
										PXK		SNORD65
										C6orf62		LRRC75A-AS1
										EIF1B		CYCS
										CHRNA2		PRPF39
										CLIP4		YPEL5
										NIN		PSMA3
										QKI		SEL1L3
										C18orf8		LIN7C
										PLXDC2		WDR89
										CORO1C		CCDC90B
										ABTB1		TC2N
										TMEM33		ZEB1
										CYP11B2		SMC6
										RUNX1T1		VRK2
										LOC643802		C11orf57
										DYNC1I2		ZNF28
										MYO19		MRPS23
										BLZF1		PHB
										SLC39A10		RCVRN
										RETSAT		RPL22L1
										GRK4		CBX3
										PRKCA		SEC11A
										GRAP		ZNF131
										PRIM1		RPL36A
										GTPBP4		CSNK1G3
										SUPT7L		ZCCHC10
										WDR19		MALT1
										TOP2A		ENY2
										LRIG1		ARID4B
										UBL5		PPWD1
										TMEM156		PARK7
										GNG7		ZCCHC7
										PHB		C11orf58
										BRK1		COX7A2
										IL2RA		TXNDC9
										TRMT13		VPREB3
										RAB15		DYNC1I2
										ZNF830		CD200R1
										ITGB3BP		CEP290
										RPL36A		HSPD1
										NEDD1		SLC35A1
										TAF12		URI1
										NDUFA6		POLR2K
										HMGB2		RPF2
										RPF2		FXR1
										EML1		MIER3
										COX10		GHITM
										NDUFB1		DCUN1D4
										NDUFA6		DNAJB9
										B3GALT2		UFL1
										TMEM116		PBDC1
										AKR1C3		ATAD5
										ZNF510		COBLL1
										NUCKS1		MID2
										LSM3		MPP6
										ZNF184		TPP2
										WDR76		ZNF91
										NUP37		RBM12B
										METTL23		ICOS
										OSTC		PPA1
										PPIH		LSM8
										STX8		ZNF322
										C9orf114		RECQL
										PET100		ACTR6
										ACADM		CLEC4D
										MED7		XPO1
										UXT		SNRPB2
										IDO1		CKS2
										SMDT1		ZNF708
										RPS26		CCDC91
										PTBP2		ACADM
										ASF1A		TOP2B
										DNAJB11		MIR4442
										SH2D1A		GLRX
										ABCE1		ZC3H15
										ZCCHC17		SNORD35B
										HPGD		RPS11
										NDUFA6		PFDN5
										PSMC6		MRFAP1L1
										CCNT1		MINA
										MGST3		SF3B1
										SKA3		SBDS
										TAF15		VPS29
										GTSF1		TMEM258
										TIPIN		MIR611
										RPL9P25		TRIB2
										MRPL40		CWF19L2
										MRPS6		GCNT4
										SLC5A3		BCAP29
										PLEKHA1		SLTM
										LUC7L3		SS18L2
										AGAP1		EIF4E
										GSKIP		TAF7
										GCC2		RPL29
										ASCC3		SC5D
										CYCS		TMF1
										USP16		YEATS4
										CD200R1		POLI
										RANBP1		ATP5L2
										THAP9-AS1		MRPL42
										RBM41		USP47
										NOSIP		MRPL36
										PSMA2		U2SURP
										CCR4		NDUFA6
										GTF2H5		MIR6839
										S100PBP		ZNF107
										ACTR6		ZNF484
										ZC3H15		PPIL1
										ZBTB8OS		PUS7L
										IP6K2		CENPK
										GBP3		TAF9
										KIAA0391		AK6
										RPL41		MRS2
										ZFAND1		ZCRB1
										VDAC3		MIR7851
										TOMM7		ADAM28
										ESF1		HSPA9
										ATP6V1E1		BLOC1S1
										GNL2		IGBP1
										COX6A1		COPS2
										ATP5O		NUDCD1
										CEP57		ATP6V1G1
										RPL36A		RPF1
										HNRNPH2		PHIP
										RPL41P1		ATP5F1
										UQCRB		ZNF267
										RPL27A		DNAJC15
										SNORA3A		COX6A1
										SNORA3B		APLF
										C12orf57		NAT1
										RNU7-1		KLRC4-KLRK1
										RPS27L		KLRK1
										SUB1		KLRC4
										MRPL51		EIF3M
										RPL41		MIR2110
										FAU		CCDC186
										RPS10		CCT6A
										RPL41P5		RPL27A
										RPL26		SNORA3A
										RPL21		SNORA3B
												PRDX1
												TRMT6
												NDUFB1
												CCDC82
												NFYB
												RNASE6
												KLRC3
												PSMA2
												RPS16
												TMSB10
												BIRC3
												ARPC3
												COX6C
												ACOT13
												TTC37
												TBC1D15
												RPS27L
												NDUFC2-KCTD14
												NDUFC2
												KCTD14
												USMG5
												MIR1307
												PRKACB
												ERH
												PHAX
												EIF4A2
												SNORA63
												SNORD2
												SNORA4
												SNORA81
												MIR1248
												MRPS21
												TXN
												TMCO1
												ADPRM
												RSL24D1
												UCHL3
												GZMA
												HMGB2
												GPR183
												CHORDC1
												SRP72
												PSMA7
												SF3B6
												KPNA5
												UBE2V2
												NDUFS5
												MS4A1
												ATG3
												N4BP2L2
												SAMD9
												CASP8AP2
												NPM1
												FGFBP2
												CLEC2D
												BANK1
												OTUD6B
												MYL6
												CCDC7
												ATM
												EVI2A
												EVI2B
												DBI
												LSM3
												ATP5L
												MATR3
												SNORA74A
												SNHG4
												COX7B
												PSMC2
												SCP2
												RPL37A
												MYL12B
												CALM2
												USP16
												RPS5
												RPL14
												MRPL51
												USP15
												MIR6125
												RPL36AL
												HERC5
												BTF3
												PSMC6
												TRAT1
												CLC
												ASUN
												SRP14
												PSMA4
												CSTA
												TMX1
												HIST1H4C
												SSB
												NIFK
												DNAJA1
												RAN
												HMGB1
												RPL10A
												RPL15
												RPL4
												SNORD16
												SNORD18A
												SNORD18B
												SNORD18C
												NDUFA4
												PDCD10
												MAP3K7CL
												SOD1
												GMFG
												TOMM7
												HIST1H4E
												RPS14
												TAX1BP1
												RPL24
												LPAR6
												RPS4X
												NACA
												ATP5O
												EEF1A1P5
												PSMA6
												TMSB4X
												RPL13A
												SNORD35A
												SNORD34
												SNORD33
												SNORD32A
												RPL27
												BCL2A1
												RPL3
												SNORD83B
												SNORD43
												CLEC2B
												SNRPN
												SNURF
												SNORD107
												PWARSN
												RPS12
												RPSA
												SNORA62
												SNORA6
												RPL12
												RPL41
												RPL41P2
												AIF1
												UQCRB
												SUB1
												COX7C
												MIR3607
												RPL32
												SNORA7A
												JCHAIN
												EEF1B2
												SNORA41
												RPL36A-HNRNPH2
												NSA2
												RPL41P1
												HAT1
												RPS20
												SNORD54
												RPL9P7
												HSP90AA1
												RPL31
												CD52
												RPS8
												SNORD55
												SNORD46
												SNORD38A
												SNORD38B
												RPL21
												RPS13
												SNORD14B
												RPL41P5
												RPL39
												SNORA69
												COMMD6
												ATP5J
												LDHB
												RPS18
												EIF3E
												PPIA
												RPS27A
												RPL41
												TPT1
												SNORA31
												RPS29
												RPL32P29
												RPL22
												RPL6
												RPL41
												RPL30
												ANXA1
												RPL35
												RPL35A
												RPL37
												RPL9
												S100A8
												RPL11
												RPL17-C18orf32
												RPS6
												RPL36A
												RPS25
												SNORD102
												SNORA27
												RPL21
												RPS21
												RPL9
												RPL41
												RPS7
												RPS10
												RPL21
												RPL23
												SNORA21
												RPS15A
												RPS25
												RPS27
												RPS24
												RPS23
												RPL26
												RPL7
												RPS3A
												SNORD73A
												RPL17
												SNORD58A
												SNORD58B
												RPL17
												SNORD58A
												SNORD58B
												SNORD58C
												RPS17
												RPL5
												SNORD21
												SNORA66
												RPL34
