# Supplementary material for: Latent Tuberculosis infection in high TB disease burden countries dysregulates cellular and immunological profiles which is further enhanced with uncontrolled hyperglycemia
Source: Research Square preprint supplement (doi:10.21203/rs.3.rs-7604610/v1), 2025-10-17
Supplement: Supplementary file 5 [file e7b3e1bd87d8329111c54059.xlsx]

## Sheet: S_tab_3
	S Table 3. References used for comparison of the active TB risk signature
Number	Reference	Gene Signature	Genes
1	Warsinske, H. C. et al. Assessment of Validity of a Blood-Based 3-Gene Signature Score for Progression and Diagnosis of Tuberculosis, Disease Severity, and Treatment Response. JAMA Netw Open 1, e183779, doi:10.1001/jamanetworkopen.2018.3779 (2018).	3 gene	DUSP3, GBP5 and KLF
2	Suliman, S. et al. Four-Gene Pan-African Blood Signature Predicts Progression to Tuberculosis. Am J Respir Crit Care Med.2018. 197(9):1198-1208.	4 gene	GAS6 and SEPT4 (septin 4), and CD1C and BLK
3	Penn-Nicholson A, Mbandi SK, Thompson E, Mendelsohn SC, Suliman S, Chegou NN, et al. RISK6, a 6-gene transcriptomic signature of TB disease risk, diagnosis and treatment response. Sci Rep. 2020;10(1):8629.	RISK6 gene	GBP2, FCGR1B, and SERPING1. TUBGCP6, TRMT2A, and SDR39U1
4	Mulenga, H. et al. Longitudinal Dynamics of a Blood Transcriptomic Signature of Tuberculosis. Am J Respir Crit Care Med . 2021 Dec 15;204(12):1463-1472.	RISK11	BATF2, ETV7, FCGR1C, GBP1, GBP2, GBP5, SCARF1, SERPING1, STAT1, TAP1 and TRAFD1
