# Supplementary material for: Latent Tuberculosis infection in high TB disease burden countries dysregulates cellular and immunological profiles which is further enhanced with uncontrolled hyperglycemia
Source: Research Square preprint supplement (doi:10.21203/rs.3.rs-7604610/v1), 2025-10-17
Supplement: Supplementary file 6 [file f74078678ec30a11530378c1.xlsx]

## Sheet: S_tab_4
		S Table 4. List of DEGs common between this study and published work
		Ref *study used was 'Eckold C, Kumar V, Weiner Rd J, Alisjahbana B, Riza AL, Ronacher K, et al. Impact of intermediate hyperglycaemia as well as diabetes on immune dysfunction in tuberculosis. Clin Infect Dis. 2020.'
	A.	DEGs compared between diabetic individuals and healthy controls
			Up DEGs			Down DEGs
		Ref study	This study	Fold Change	Ref study	This study	Fold Change
		DDX56	DDX56	-2.17	ABCA1	ABCA1	-2.34
					ABCG1	ABCG1	-2.03
					ABHD2	ABHD2	-2.36
					ACTN1	ACTN1	-3.02
					AGO4	AGO4	-2.11
					ASAP1	ASAP1	2.02
					ATP2B4	ATP2B4	-2.08
					CACUL1	CACUL1	-2.46
					CCNG2	CCNG2	-2.44
					CHST11	CHST11	-2.21
					CHST15	CHST15	-2.67
					ETS2	ETS2	-2.18
					GABARAPL1	GABARAPL1	-2.49
					GLUL	GLUL	-2.61
					IGF2R	IGF2R	-2.99
					IQGAP1	IQGAP1	-2.24
					IRF2BPL	IRF2BPL	-2.2
					IRS2	IRS2	-2.06
					JAK1	JAK1	-2.39
					LAMP2	LAMP2	-2.68
					LBR	LBR	-2.23
					MBP	MBP	-2.31
					MCL1	MCL1	-2.05
					MYH9	MYH9	-2.61
					PAK2	PAK2	-2.18
					PELI1	PELI1	-2.14
					PRKAR1A	PRKAR1A	-2.21
					PRKDC	PRKDC	-2.49
					PTEN	PTEN	-2.12
					RAB11FIP1	RAB11FIP1	-2.63
					SEL1L	SEL1L	-2.28
					SLC15A4	SLC15A4	-2.36
					SLC2A3	SLC2A3	-3.32
					SORL1	SORL1	-5.05
					SPEN	SPEN	-2.01
					TACC1	TACC1	-2.24
					TMEM2	TMEM2	-2.45
					TMX4	TMX4	-2.38
					TSC22D3	TSC22D3	-2.14
					VPS8	VPS8	-2.09
					ZZEF1	ZZEF1	-2.04
	B.	DEGs between individuals with Uncontrolled versus Controlled hyperglycemia within the DM-LTBI group
			Up DEGs			Down DEGs
		Ref study	This study	Fold Change	Ref study	This study	Fold Change
		ATP5L	ATP5L	4.24	BICD2	BICD2	-2.13
		BLOC1S1	BLOC1S1	3.02	CD93	CD93	-2.98
		BTF3	BTF3	4.92	GLUL	GLUL	-2.86
		CCNB1IP1	CCNB1IP1	2.22	HK2	HK2	-2.02
		CD52	CD52	11.84	JARID2	JARID2	-2.16
		COMMD6	COMMD6	14.72	MTMR3	MTMR3	-2.19
		COX6A1	COX6A1	3.11	NEDD9	NEDD9	-2.63
		COX7A2	COX7A2	2.59	NPEPPS	NPEPPS	-2.28
		COX7C	COX7C	8.79	PTPRJ	PTPRJ	-4.88
		CSTA	CSTA	5.3	SVIL	SVIL	-2.96
		CWC15	CWC15	2.18	TMCC1	TMCC1	-2.4
		DBI	DBI	4.09	TPR	TPR	2.14
		ERH	ERH	3.46
		FBL	FBL	2.33
		LSM3	LSM3	4.16
		MRPL36	MRPL36	2.96
		MRPL51	MRPL51	4.74
		MRPS21	MRPS21	3.48
		MRPS23	MRPS23	2.53
		MYL12B	MYL12B	4.6
		MYL6	MYL6	3.95
		NACA	NACA	6.94
		NDUFA4	NDUFA4	5.83
		NDUFS5	NDUFS5	3.74
		NSA2	NSA2	9.5
		PARK7	PARK7	2.57
		PBDC1	PBDC1	2.66
		PFDN5	PFDN5	2.83
		PFDN6	PFDN6	2.01
		PPA1	PPA1	2.7
		PPIA	PPIA	15.99
		PRDX1	PRDX1	3.19
		PRDX6	PRDX6	-4.18
		PSMC2	PSMC2	4.33
		RAN	RAN	5.57
		RPL10A	RPL10A	5.69
		RPL11	RPL11	26.35
		RPL12	RPL12	8.09
		RPL13A	RPL13A	7.15
		RPL14	RPL14	4.72
		RPL15	RPL15	5.72
		RPL21	RPL21	13.04
		RPL24	RPL24	6.73
		RPL26	RPL26	71.76
		RPL27	RPL27	7.17
		RPL27A	RPL27A	3.18
		RPL29	RPL29	2.92
		RPL3	RPL3	7.29
		RPL30	RPL30	20.14
		RPL32	RPL32	9.02
		RPL34	RPL34	202.78
		RPL35	RPL35	20.92
		RPL35A	RPL35A	21.63
		RPL36AL	RPL36AL	4.81
		RPL37	RPL37	22.21
		RPL37A	RPL37A	4.55
		RPL39	RPL39	13.44
		RPL41	RPL41	32.17
		RPL5	RPL5	172.45
		RPL6	RPL6	19.79
		RPS10	RPS10	33.64
		RPS11	RPS11	2.82
		RPS12	RPS12	8.05
		RPS13	RPS13	13.15
		RPS14	RPS14	6.36
		RPS15A	RPS15A	37.19
		RPS16	RPS16	3.32
		RPS18	RPS18	15.07
		RPS20	RPS20	10.82
		RPS21	RPS21	30.85
		RPS25	RPS25	38.27
		RPS27	RPS27	38.95
		RPS27A	RPS27A	16.31
		RPS29	RPS29	17.35
		RPS5	RPS5	4.7
		RPS6	RPS6	28.35
		RPS8	RPS8	11.96
		RPSA	RPSA	8.08
		SNRPD3	SNRPD3	2.05
		SOD1	SOD1	5.93
		SRP14	SRP14	5.21
		SS18L2	SS18L2	2.91
		TESC	TESC	-2.35
		TMEM258	TMEM258	2.87
		TMSB10	TMSB10	3.35
		TOMM7	TOMM7	6.08
		UQCR10	UQCR10	2.41
		UQCRQ	UQCRQ	2.3
